# Supplementary material for: Highly-scaled and fully-integrated 3-dimensional ferroelectric transistor array for hardware implementation of neural networks
Source: Springer Nature journal article supplement (doi:10.1038/s41467-023-36270-0), 2023-01-31
Supplement: MOESM1 [file 41467_2023_36270_MOESM1_ESM.pdf]

## Supplementary Information

# **Highly-Scaled and Fully-Integrated 3-Dimensional Ferroelectric Transistor Array for Hardware Implementation of Neural Networks**

Ik-Jyae Kim<sup>1</sup>, Min-Kyu Kim<sup>1</sup>, and Jang-Sik Lee<sup>1\*</sup>

<sup>1</sup>Department of Materials Science and Engineering, Pohang University of Science and Technology (POSTECH), Pohang 37673, Republic of Korea

\*E-mail: jangsik@postech.ac.kr

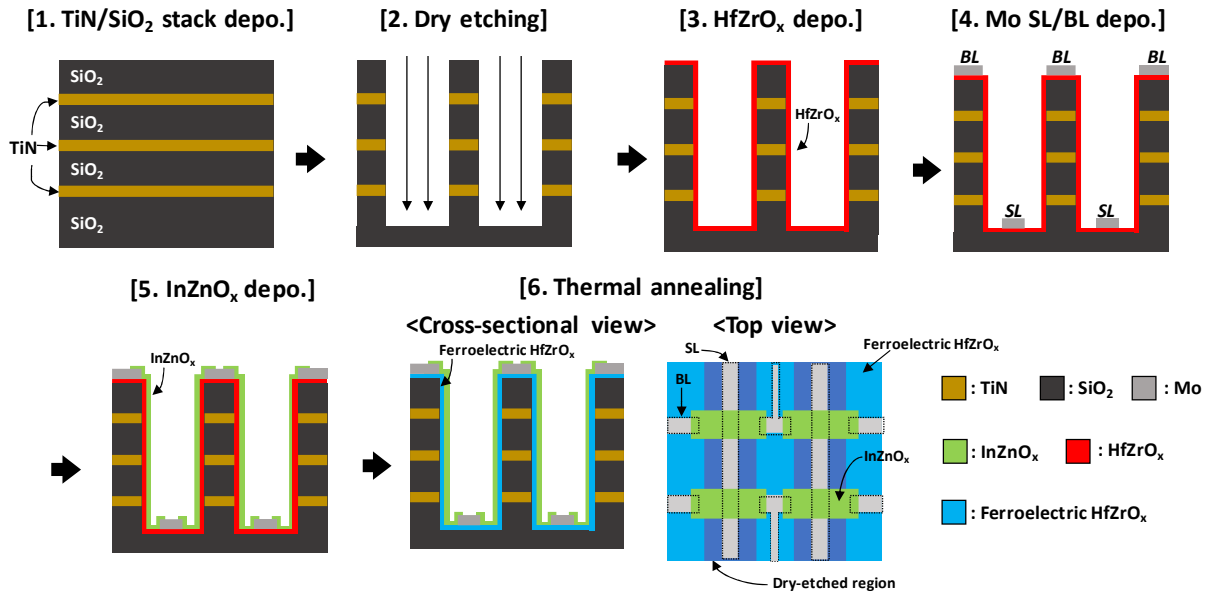

Supplementary Figure 1. Fabrication process of the 3D ferroelectric NAND (FeNAND). After the deposition of TiN WLs and SiO<sub>2</sub> layers, the etching process was done to form trench structures. Then, the HfZrO<sub>x</sub> gate insulator, Mo SL/BL, and InZnO<sub>x</sub> channel were deposited. Finally, annealing was done to induce ferroelectricity in the HfZrO<sub>x</sub> layer. 3D FeNAND is composed of three vertically stacked WLs.

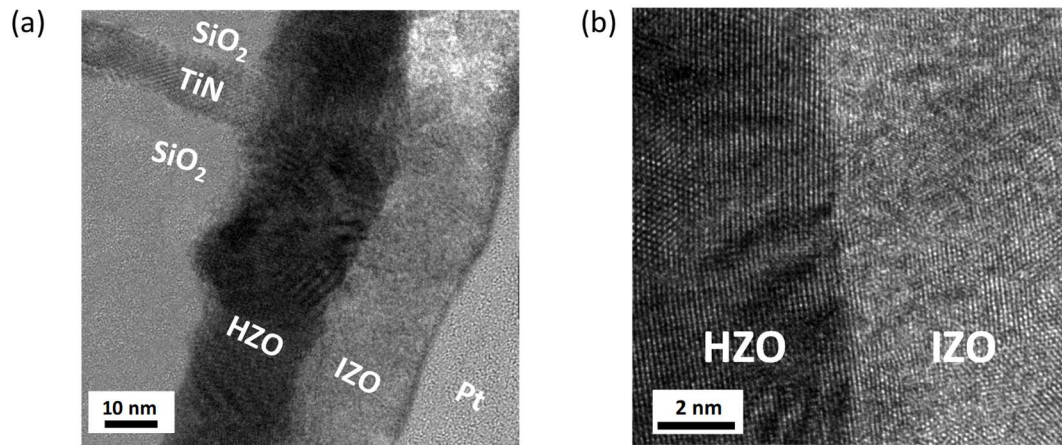

Supplementary Figure 2. Transmission electron microscope image of the (a) side-wall and (b) interface between  $\text{HfZrO}_x$  and  $\text{InZnO}_x$  of 3D FeNAND.

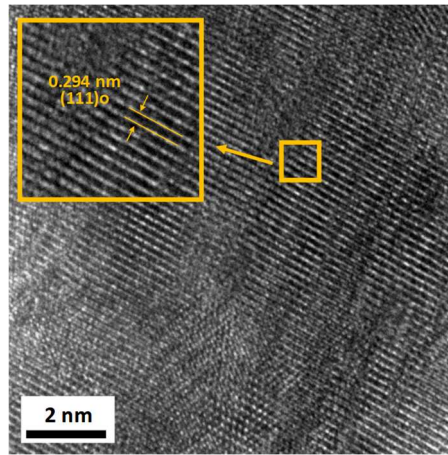

Supplementary Figure 3. Transmission electron microscope image of the  $\text{HfZrO}_x$  layer in the sidewall of 3D FeNAND (inset: a magnified image of the corresponding area).

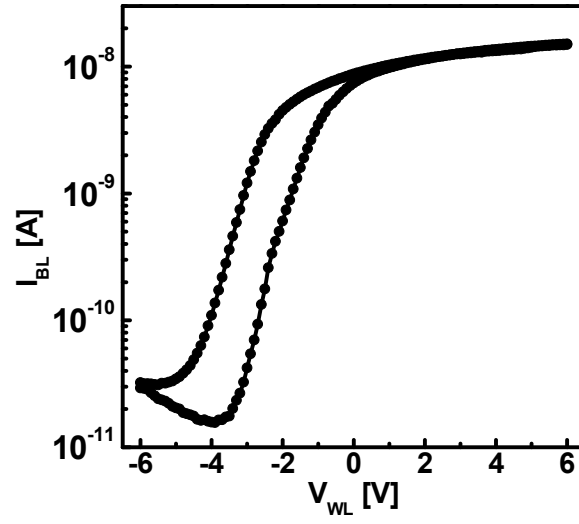

Supplementary Figure 4. Transfer characteristic of 3D FeNAND memory cell. The  $V_{PASS}$  of 2 V was applied to the unselected WLs.

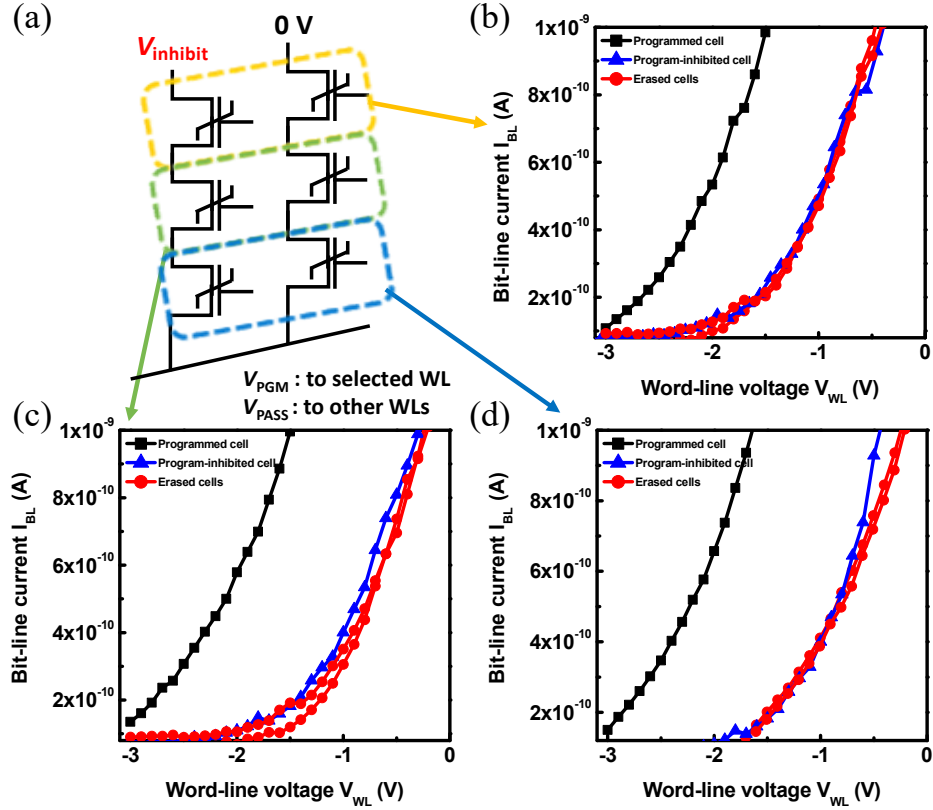

Supplementary Figure 5. Program-inhibit operation of 3D FeNAND. (a) Equivalent circuit of 3D FeNAND and program operation.  $V_{\text{PGM}}$ ,  $V_{\text{PASS}}$ , and  $V_{\text{inhibit}}$  stand for program, pass, and inhibit voltage, respectively.  $I_{\text{BL}}-V_{\text{WL}}$  curves of the selected memory cell and WL-sharing memory cell after erase and program operation located at (b) top WL, (c) middle WL, and (d) bottom WL. The program of WL-sharing memory cell is prevented by program-inhibit operation.

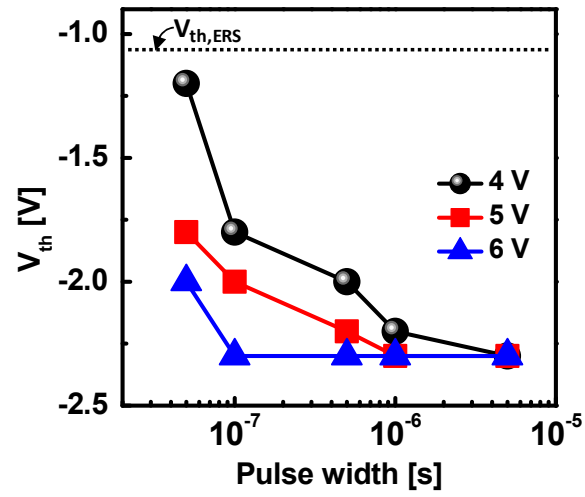

Supplementary Figure 6. Program speed of 3D FeNAND memory cell under different pulse amplitudes.

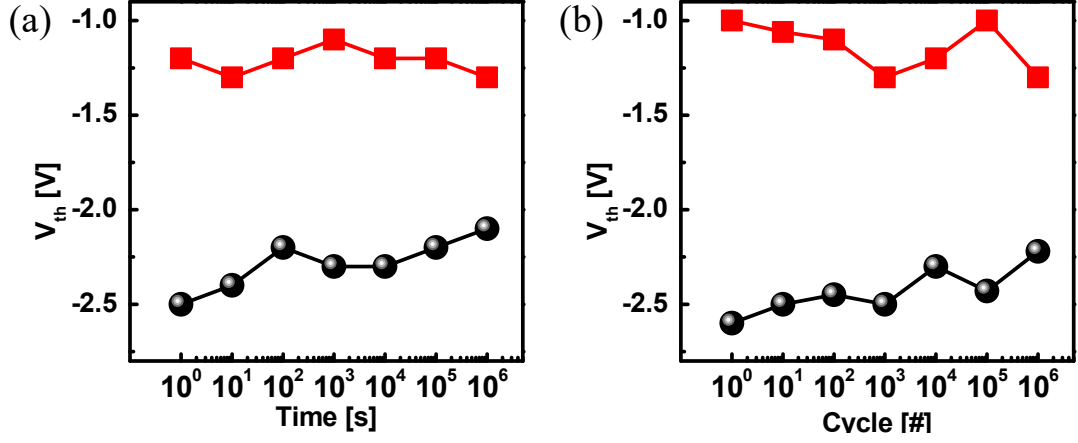

Supplementary Figure 7. (a) Data retention characteristics of 3D FeNAND memory cell for  $10^6$  s. The devices were programmed and erased using triangular voltage pulses of (4 V, 10  $\mu$ s) and (-4 V, 10  $\mu$ s), respectively. (b) Endurance characteristics of 3D FeNAND memory cell for  $10^6$  cycles. For endurance analysis, positive (4 V, 10  $\mu$ s) and negative (-4 V, 10  $\mu$ s) triangular pulses were used for program and erase operations, respectively.



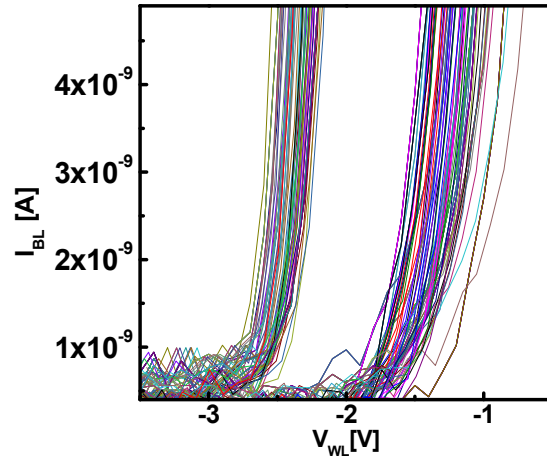

Supplementary Figure 8.  $I_{BL}$ -  $V_{WL}$  characteristics 100 3D FeNAND memory cells at programmed and erased states.

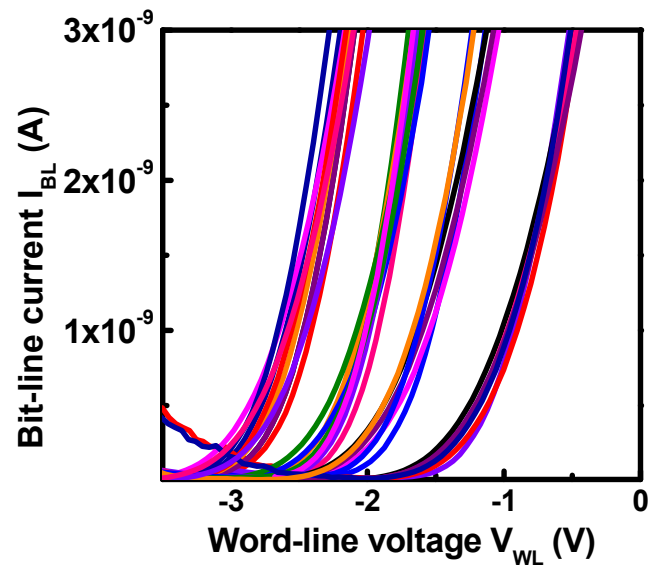

Supplementary Figure 9.  $V_{th}$  tuning characteristics of memory cell in 3D FeNAND.

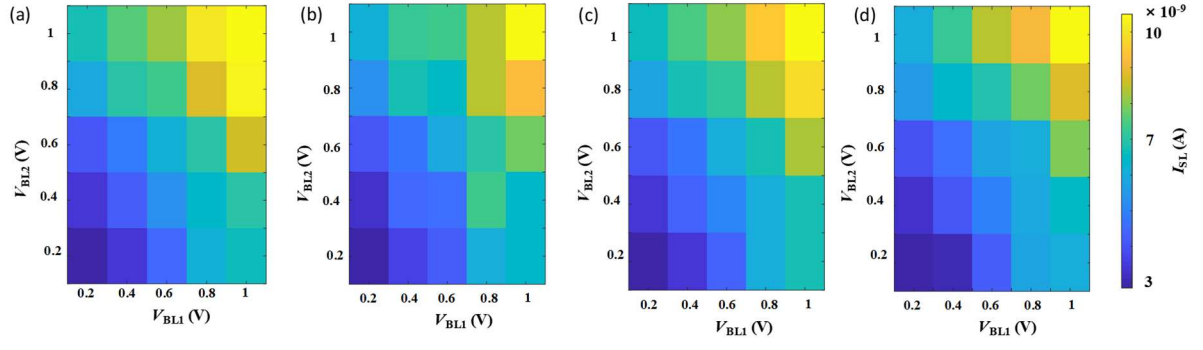

Supplementary Figure 10. (a-d) Device-to-device variation of VMM outputs. Four different 3D FeNAND array was used for VMM operations.

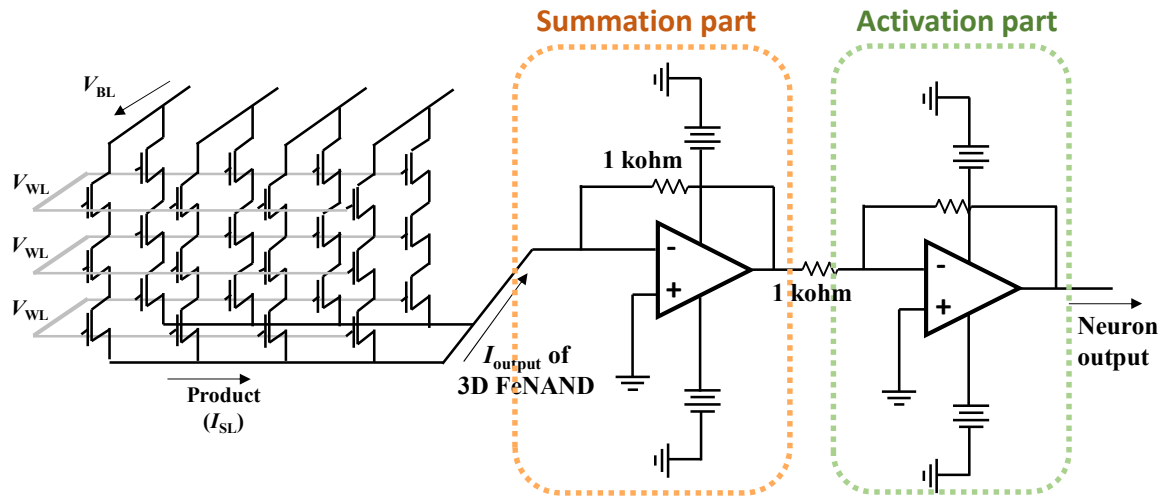

Supplementary Figure 11. Activation circuit composed of two op-amps for converting output  $I_{SL}$  to the neuron output voltage.

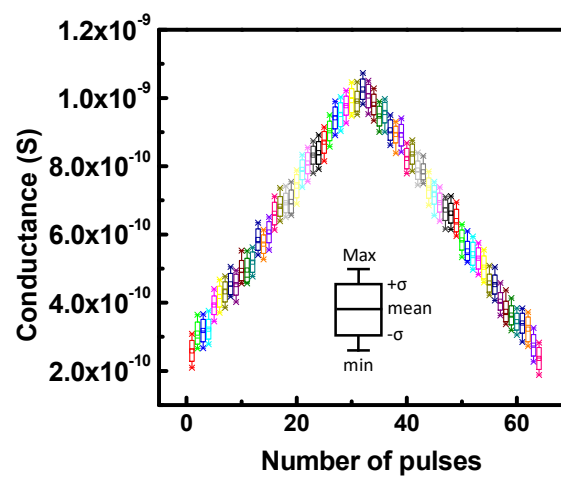

Supplementary Figure 12. Device-to-device variation characteristics of potentiation and depression cycles of 20 devices.

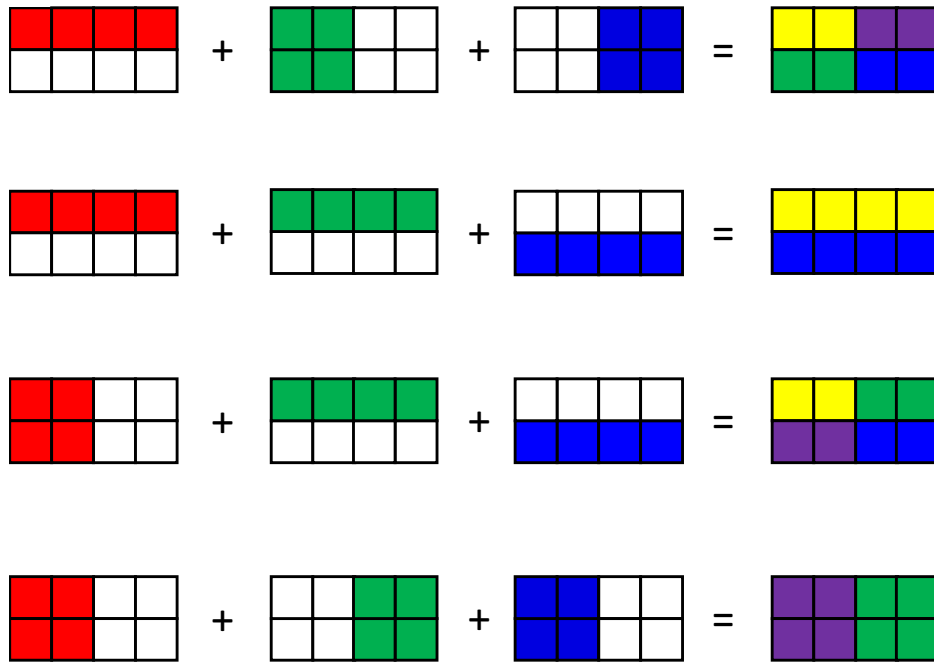

Supplementary Figure 13. Example of training/test patterns. Training and test patterns with a pixel size of  $4 \times 2$  were fabricated by randomly adding the box and line patterns with red, green, or blue colors.
